# Supplementary material for: A series of novel Pb(ii) or Pb(ii)/M(ii) (M = Ca and Sr) hybrid inorganic–organic frameworks based on polycarboxylic acids with diverse Pb–O–M (M = Pb, Ca and Sr) inorganic connectivities
Source: Royal Society of Chemistry journal article supplement (doi:10.1039/c004010j), 2010-01-01
Supplement: c004010j.pdf [file c004010j.pdf]

## Supplementary Information

### A series of novel Pb(II) or Pb(II)/M(II) (M = Ca and Sr) hybrid inorganic-organic frameworks based on polycarboxylic acids with diverse Pb–O–M (M = Pb, Ca and Sr) inorganic connectivities

Jian-Di Lin <sup>a, b</sup>, Shu-Ting Wu <sup>c</sup>, Zhi-Hua Li <sup>a</sup>, Shao-Wu Du <sup>a, \*</sup>

<sup>a</sup> State Key Laboratory of Structural Chemistry, Fujian Institute of Research on the Structure of Matter, Chinese Academy of Sciences, Fuzhou, Fujian 350002, P. R. China;

<sup>b</sup> Graduate University of Chinese Academy of Sciences, Beijing 100039, P. R. China;

<sup>c</sup> College of Chemistry and Chemical Engineering, Fuzhou University, Fuzhou, Fujian 350002, P. R. China.

Tables S1–S6 Selected bond distances (Å) and angles (°) for compounds 1–6

Table S1 Selected bond distances (Å) and angles (°) for compound 1

|                     |            |                        |             |
|---------------------|------------|------------------------|-------------|
| Pb1—O1              | 2.495 (3)  | Pb1—O2                 | 2.614 (3)   |
| Pb1—O3              | 2.523 (3)  | Pb1—O4                 | 2.635 (3)   |
| Pb1—O5              | 2.596 (3)  | Pb1—O1 <sup>i</sup>    | 2.754 (3)   |
| Pb1—O3 <sup>i</sup> | 2.704 (3)  | O1—Pb1—O3 <sup>i</sup> | 91.19 (10)  |
| O1—Pb1—O3           | 76.38 (11) | O3—Pb1—O3 <sup>i</sup> | 150.67 (8)  |
| O1—Pb1—O5           | 72.75 (10) | O5—Pb1—O3 <sup>i</sup> | 80.04 (12)  |
| O3—Pb1—O5           | 70.96 (12) | O2—Pb1—O3 <sup>i</sup> | 103.73 (12) |
| O1—Pb1—O2           | 51.18 (10) | O4—Pb1—O3 <sup>i</sup> | 152.64 (11) |

|           |             |                                      |             |
|-----------|-------------|--------------------------------------|-------------|
| O3—Pb1—O2 | 89.16 (13)  | O1—Pb1—O1 <sup>i</sup>               | 153.09 (2)  |
| O5—Pb1—O2 | 123.65 (11) | O3—Pb1—O1 <sup>i</sup>               | 111.55 (11) |
| O1—Pb1—O4 | 115.84 (12) | O5—Pb1—O1 <sup>i</sup>               | 85.37 (10)  |
| O3—Pb1—O4 | 49.80 (11)  | O2—Pb1—O1 <sup>i</sup>               | 149.43 (10) |
| O5—Pb1—O4 | 110.75 (12) | O4—Pb1—O1 <sup>i</sup>               | 86.16 (12)  |
| O2—Pb1—O4 | 91.19 (13)  | O3 <sup>i</sup> —Pb1—O1 <sup>i</sup> | 69.28 (10)  |

Symmetry codes: (i)  $-x+3/2, y-1/2, -z+1/2$ ; (ii)  $-x+3/2, y+1/2, -z+1/2$ ; (iii)  $-x+2, -y+2, -z+1$ ; (iv)  $-x+2, -y+2, -z$ .

Table S2 Selected bond distances (Å) and angles (°) for compound 2

|                                       |             |                                        |             |
|---------------------------------------|-------------|----------------------------------------|-------------|
| Pb1—O3 <sup>i</sup>                   | 2.554 (5)   | Ca1—O9                                 | 2.252 (5)   |
| Pb1—O6 <sup>ii</sup>                  | 2.593 (4)   | Ca1—O5 <sup>iv</sup>                   | 2.300 (4)   |
| Pb1—O4 <sup>i</sup>                   | 2.670 (4)   | Ca1—O4 <sup>i</sup>                    | 2.304 (4)   |
| Pb1—O2                                | 2.696 (4)   | Ca1—O2                                 | 2.317 (4)   |
| Pb1—O1                                | 2.707 (5)   | Ca1—O8 <sup>ii</sup>                   | 2.320 (4)   |
| Pb1—O5                                | 2.727 (4)   | Ca1—O7 <sup>v</sup>                    | 2.333 (5)   |
| O3 <sup>i</sup> —Pb1—O4 <sup>i</sup>  | 49.86 (14)  | O9—Ca1—O4 <sup>i</sup>                 | 92.9 (2)    |
| O6 <sup>ii</sup> —Pb1—O4 <sup>i</sup> | 77.43 (14)  | O5 <sup>iv</sup> —Ca1—O4 <sup>i</sup>  | 171.12 (16) |
| O3 <sup>i</sup> —Pb1—O2               | 117.42 (14) | O9—Ca1—O2                              | 168.1 (2)   |
| O6 <sup>ii</sup> —Pb1—O2              | 89.04 (13)  | O5 <sup>iv</sup> —Ca1—O2               | 95.40 (16)  |
| O4 <sup>i</sup> —Pb1—O2               | 68.08 (12)  | O4 <sup>i</sup> —Ca1—O2                | 81.10 (14)  |
| O3 <sup>i</sup> —Pb1—O1               | 165.04 (19) | O9—Ca1—O8 <sup>ii</sup>                | 103.5 (2)   |
| O6 <sup>ii</sup> —Pb1—O1              | 91.8 (2)    | O5 <sup>iv</sup> —Ca1—O8 <sup>ii</sup> | 79.26 (15)  |
| O4 <sup>i</sup> —Pb1—O1               | 115.19 (15) | O4 <sup>i</sup> —Ca1—O8 <sup>ii</sup>  | 92.36 (15)  |
| O2—Pb1—O1                             | 47.75 (15)  | O2—Ca1—O8 <sup>ii</sup>                | 87.03 (16)  |

|                                      |             |                                       |             |
|--------------------------------------|-------------|---------------------------------------|-------------|
| O3 <sup>i</sup> —Pb1—O5              | 85.44 (16)  | O9—Ca1—O7 <sup>v</sup>                | 90.9 (2)    |
| O6 <sup>ii</sup> —Pb1—O5             | 118.14 (12) | O5 <sup>iv</sup> —Ca1—O7 <sup>v</sup> | 109.07 (17) |
| O4 <sup>i</sup> —Pb1—O5              | 132.90 (13) | O4 <sup>i</sup> —Ca1—O7 <sup>v</sup>  | 78.30 (17)  |
| O2—Pb1—O5                            | 146.80 (13) | O2—Ca1—O7 <sup>v</sup>                | 77.84 (17)  |
| O1—Pb1—O5                            | 108.72 (18) | O8 <sup>ii</sup> —Ca1—O7 <sup>v</sup> | 163.22 (17) |
| O3 <sup>i</sup> —Pb1—O4 <sup>i</sup> | 49.86 (14)  |                                       |             |

Symmetry codes: (i)  $x+1, y, z$ ; (ii)  $-x, -y+2, -z$ ; (iii)  $-x, y+1/2, -z+1/2$ ; (iv)  $-x, y-1/2, -z+1/2$ ; (v)  $x, -y+5/2, z+1/2$ ; (vi)  $x-1, y, z$ ; (vii)  $x, -y+5/2, z-1/2$ .

Table S3 Selected bond distances (Å) and angles (°) for compound 3

|                                         |              |                                        |            |
|-----------------------------------------|--------------|----------------------------------------|------------|
| Pb1—O2                                  | 2.326 (4)    | Ca1—O1                                 | 2.323 (4)  |
| Pb1—O4 <sup>ii</sup>                    | 2.668 (4)    | Ca1—O6                                 | 2.352 (7)  |
| Pb1—O3 <sup>ii</sup>                    | 2.859(4)     | Ca1—O3 <sup>ii</sup>                   | 2.304 (4)  |
| O2—Pb1—O2 <sup>i</sup>                  | 73.992(37)   | O3 <sup>v</sup> —Ca1—O3 <sup>iii</sup> | 171.53 (6) |
| O2—Pb1—O4 <sup>ii</sup>                 | 74.641(37)   | O3 <sup>v</sup> —Ca1—O1 <sup>vi</sup>  | 83.91 (4)  |
| O2 <sup>i</sup> —Pb1—O4 <sup>ii</sup>   | 81.779 (37)  | O3 <sup>v</sup> —Ca1—O1                | 89.70 (4)  |
| O4 <sup>ii</sup> —Pb1—O4 <sup>iii</sup> | 150.413 (33) | O1 <sup>vi</sup> —Ca1—O1               | 82.21 (6)  |
| O2—Pb1—O3 <sup>iii</sup>                | 76.416(38)   | O1—Ca1—O6 <sup>vi</sup>                | 90.54 (6)  |
| O2—Pb1—O3 <sup>ii</sup>                 | 116.982(37)  | O3 <sup>v</sup> —Ca1—O6                | 91.61 (5)  |
| O3 <sup>iii</sup> —Pb1—O3 <sup>ii</sup> | 164.251(36)  | O3 <sup>iii</sup> —Ca1—O6              | 94.02 (5)  |
| O3 <sup>iii</sup> —Pb1—O4 <sup>ii</sup> | 138.989(33)  | O1—Ca1—O6                              | 172.46 (6) |
| O3 <sup>ii</sup> —Pb1—O4 <sup>ii</sup>  | 46.794(33)   | O6 <sup>vi</sup> —Ca1—O6               | 96.78 (10) |

Symmetry codes: (i)  $x, -y+1/2, -z+1/4$ ; (ii)  $y, -x+1, -z$ ; (iii)  $y, x-1/2, z+1/4$ ; (iv)  $-x+1/2, -y+1/2, z+1/2$ ; (v)  $-y+1/2, -x+1, z-1/4$ ; (vi)  $-x+1/2, y, -z-1/4$ ; (vii)  $-x+1/2, -y+1/2, z-1/2$ ; (viii)  $-y+1, x, -z$ .

Table S4 Selected bond distances (Å) and angles (°) for compound 4

|                                         |             |                                         |             |
|-----------------------------------------|-------------|-----------------------------------------|-------------|
| Pb1—O9 <sup>i</sup>                     | 2.278 (5)   | Sr1—O2                                  | 2.434 (6)   |
| Pb1—O1                                  | 2.483 (6)   | Sr1—O3 <sup>iv</sup>                    | 2.476 (6)   |
| Pb1—O4 <sup>ii</sup>                    | 2.582 (5)   | Sr1—O8 <sup>v</sup>                     | 2.500 (5)   |
| Pb1—O3 <sup>ii</sup>                    | 2.678 (6)   | Sr1—O7 <sup>vi</sup>                    | 2.597 (6)   |
| Pb1—O6 <sup>iii</sup>                   | 2.711 (5)   | Sr1—O6 <sup>iii</sup>                   | 2.604 (5)   |
| Pb1—O5 <sup>iii</sup>                   | 2.813(7)    | Sr1—O5                                  | 2.622 (5)   |
| O9 <sup>i</sup> —Pb1—O1                 | 92.4 (2)    | Sr1—O8 <sup>vi</sup>                    | 2.736 (6)   |
| O9 <sup>i</sup> —Pb1—O4 <sup>ii</sup>   | 78.4 (2)    | O3 <sup>iv</sup> —Sr1—O7 <sup>vi</sup>  | 91.9 (2)    |
| O1—Pb1—O4 <sup>ii</sup>                 | 85.10 (19)  | O8 <sup>v</sup> —Sr1—O7 <sup>vi</sup>   | 112.7 (2)   |
| O9 <sup>i</sup> —Pb1—O3 <sup>ii</sup>   | 84.4 (2)    | O2—Sr1—O6 <sup>iii</sup>                | 76.7 (2)    |
| O1—Pb1—O3 <sup>ii</sup>                 | 134.3 (2)   | O3 <sup>iv</sup> —Sr1—O6 <sup>iii</sup> | 94.52 (19)  |
| O4 <sup>ii</sup> —Pb1—O3 <sup>ii</sup>  | 49.56 (17)  | O8 <sup>v</sup> —Sr1—O6 <sup>iii</sup>  | 165.61 (18) |
| O9 <sup>i</sup> —Pb1—O6 <sup>iii</sup>  | 81.63 (18)  | O7 <sup>vi</sup> —Sr1—O6 <sup>iii</sup> | 81.1 (2)    |
| O1—Pb1—O6 <sup>iii</sup>                | 106.1 (2)   | O2—Sr1—O5                               | 82.0 (2)    |
| O4 <sup>ii</sup> —Pb1—O6 <sup>iii</sup> | 157.52 (18) | O3 <sup>iv</sup> —Sr1—O5                | 77.84 (19)  |
| O3 <sup>ii</sup> —Pb1—O6 <sup>iii</sup> | 118.33 (17) | O8 <sup>v</sup> —Sr1—O5                 | 93.68 (17)  |



|                                          |            |                                         |             |
|------------------------------------------|------------|-----------------------------------------|-------------|
| O5 <sup>iii</sup> —Pb1—O3 <sup>ii</sup>  | 71.36(19)  | O7 <sup>vi</sup> —Sr1—O5                | 151.69 (18) |
| O5 <sup>iii</sup> —Pb1—O4 <sup>ii</sup>  | 118.46(18) | O6 <sup>iii</sup> —Sr1—O5               | 73.62 (17)  |
| O5 <sup>iii</sup> —Pb1—O9 <sup>i</sup>   | 80.53(19)  | O2—Sr1—O8 <sup>vi</sup>                 | 88.1 (2)    |
| O5 <sup>iii</sup> —Pb1—O1                | 152.91(21) | O3 <sup>iv</sup> —Sr1—O8 <sup>vi</sup>  | 111.96 (19) |
| O5 <sup>iii</sup> —Pb1—O6 <sup>iii</sup> | 47.16(18)  | O8 <sup>v</sup> —Sr1—O8 <sup>vi</sup>   | 69.3 (2)    |
| O2—Sr1—O3 <sup>iv</sup>                  | 159.6 (2)  | O7 <sup>vi</sup> —Sr1—O8 <sup>vi</sup>  | 48.48 (17)  |
| O2—Sr1—O8 <sup>v</sup>                   | 95.2 (2)   | O6 <sup>iii</sup> —Sr1—O8 <sup>vi</sup> | 121.50 (17) |
| O3 <sup>iv</sup> —Sr1—O8 <sup>v</sup>    | 89.2 (2)   | O5—Sr1—O8 <sup>vi</sup>                 | 159.55 (16) |
| O2—Sr1—O7 <sup>vi</sup>                  | 104.6 (3)  |                                         |             |

Symmetry codes: (i)  $-x, -y+1, -z+2$ ; (ii)  $x, y-1, z$ ; (iii)  $-x, -y+1, -z+1$ ; (iv)  $-x, -y+2, -z+1$ ; (v)  $-x+1, -y+1, -z+1$ ; (vi)  $x-1, y+1, z$ ; (vii)  $x, y+1, z$ ; (viii)  $x+1, y-1, z$ .

Table S5 Selected bond distances (Å) and angles (°) for compound **5**

|                                       |             |                                        |             |
|---------------------------------------|-------------|----------------------------------------|-------------|
| Pb1—O1                                | 2.448 (3)   | Pb1—O1 <sup>v</sup>                    | 2.8681(37)  |
| Pb1—O2 <sup>i</sup>                   | 2.424 (3)   | Pb1—O1 <sup>vii</sup>                  | 2.8902(42)  |
| O2 <sup>i</sup> —Pb1—O1               | 118.04 (13) | O1—Pb1—O4 <sup>vii</sup>               | 140.840(83) |
| O2 <sup>ii</sup> —Pb1—O1              | 72.73 (12)  | O1 <sup>v</sup> —Pb1—O4 <sup>vii</sup> | 73.121(71)  |
| O2 <sup>i</sup> —Pb1—O2 <sup>ii</sup> | 79.65 (18)  | O2 <sup>i</sup> —Pb1—O4 <sup>vii</sup> | 94.886(80)  |

|                           |            |  |  |
|---------------------------|------------|--|--|
| O1 <sup>iii</sup> —Pb1—O1 | 73.57 (17) |  |  |
|---------------------------|------------|--|--|

Symmetry codes: (i)  $x+1/2, -y+1/2, -z+3/2$ ; (ii)  $x+1/2, y, -z+3/2$ ; (iii)  $x, -y+1/2, z$ ; (iv)  $x, -y-1/2, z$ ; (v)  $x-1/2, y, -z+3/2$ ; (vi)  $x-1/2, -y+1/2, -z+3/2$ ; (vii)  $-x+7/2, -y, z-1/2$ .

Table S6 Selected bond distances (Å) and angles (°) for compound **6**

|                          |           |                          |            |
|--------------------------|-----------|--------------------------|------------|
| Pb1—O1                   | 2.515 (4) | Ca1—O2                   | 2.308 (3)  |
| Pb1—O2                   | 2.863(4)  | Ca1—O4                   | 2.368 (4)  |
| O1 <sup>i</sup> —Pb1—O1  | 87.6 (2)  | O2—Pb1—O1 <sup>i</sup>   | 94.07(14)  |
| O1 <sup>ii</sup> —Pb1—O1 | 92.4 (2)  | O2—Pb1—O1 <sup>iii</sup> | 131.91(13) |
| O1—Pb1—O1 <sup>iii</sup> | 180       | O2—Ca1—O2 <sup>i</sup>   | 82.97(13)  |
| O2—Pb1—O1                | 48.10(13) | O2—Ca1—O2 <sup>iv</sup>  | 180        |
| O2—Pb1—O1 <sup>ii</sup>  | 85.93(14) | O2—Ca1—O2 <sup>v</sup>   | 97.03 (13) |
| O2—Pb1—O2 <sup>iii</sup> | 180       | O2—Ca1—O4                | 92.67 (9)  |
| O2—Pb1—O2 <sup>i</sup>   | 64.52(9)  | O2—Ca1—O4 <sup>vi</sup>  | 87.33 (9)  |
| O2—Pb1—O2 <sup>ii</sup>  | 115.48(9) | O4—Ca1—O4 <sup>vi</sup>  | 180        |

Symmetry codes: (i)  $x, -y, z$ ; (ii)  $-x+1, y, -z+2$ ; (iii)  $-x+1, -y, -z+2$ ; (iv)  $-x+1, -y, -z+1$ ; (v)  $-x+1, y, -z+1$ ; (vi)  $-x, y, -z$ .

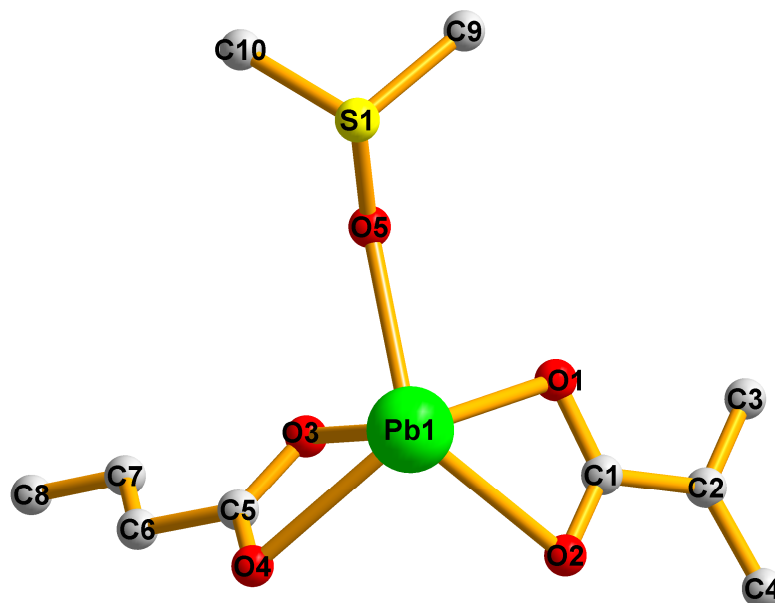

Fig. S1 View of the asymmetric unit of **1**. Hydrogen atoms are omitted for clarity.

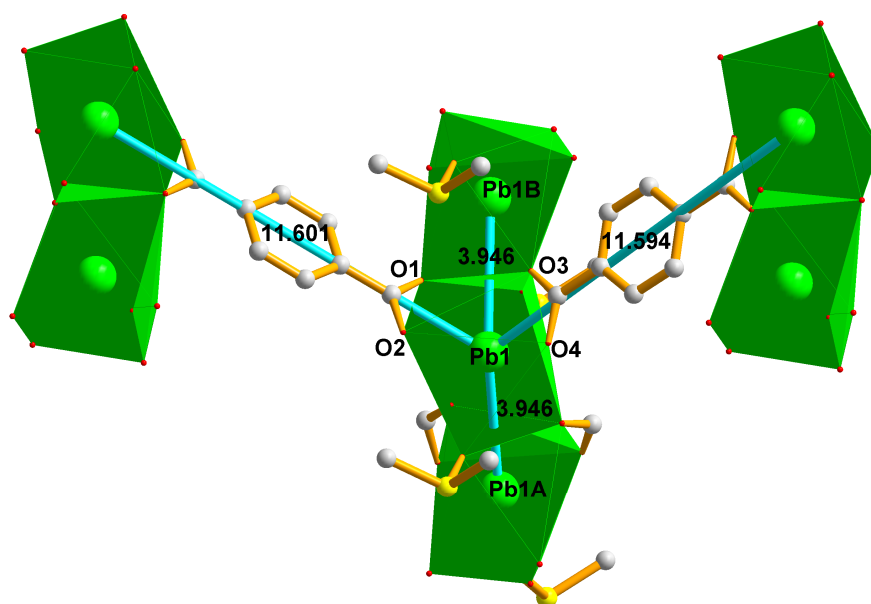

Fig. S2 View of the topological simplification mode of compound **1**.

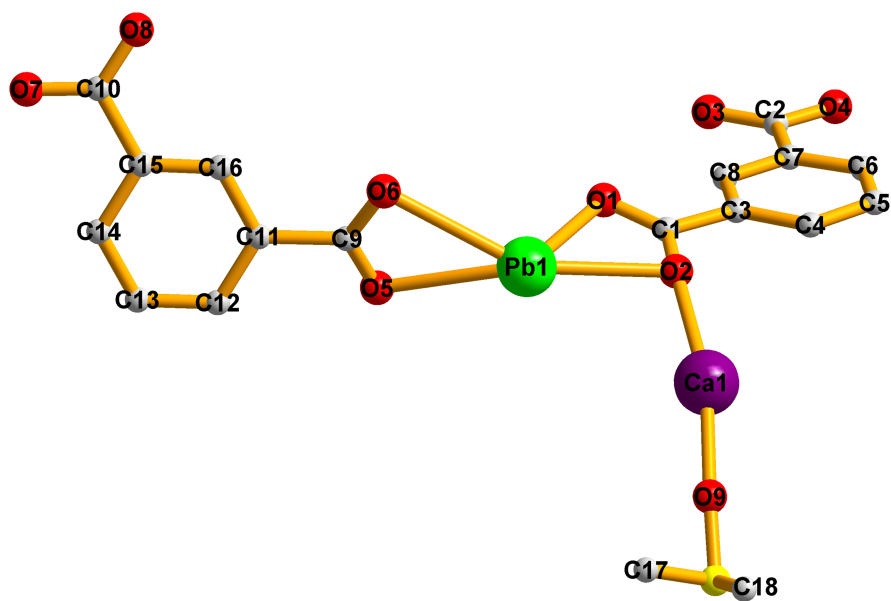

Fig. S3 View of the asymmetric unit of **2**. Hydrogen atoms are omitted for clarity.

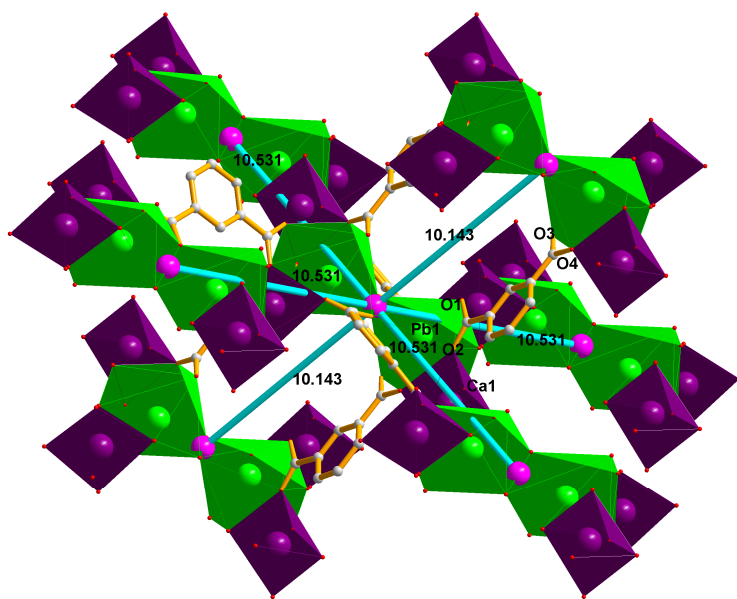

Fig. S4 View of the topological simplification mode of compound **2**.

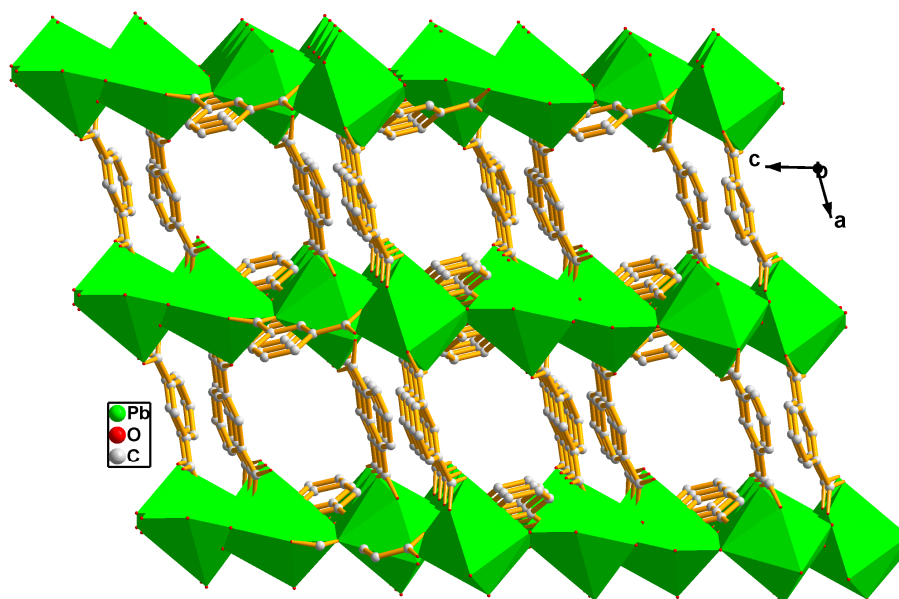

Fig. S5 Polyhedral view of the 3D anionic microporous framework with Ca(II) ions and DMSO molecules omitted for **2**. Hydrogen atoms are omitted for clarity.

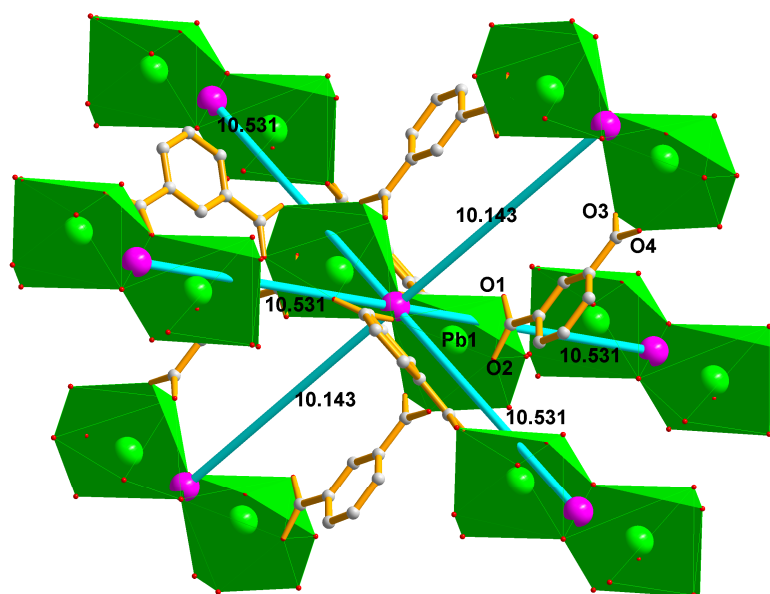

Fig. S6 View of the topological simplification mode of the Ca(II)-omitted anionic network in compound **2**.

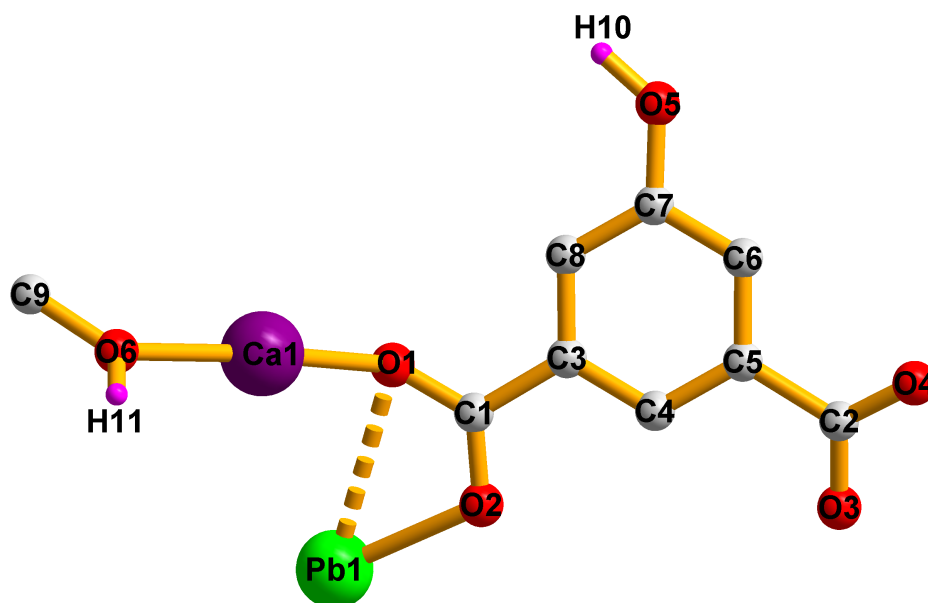

Fig. S7 View of the asymmetric unit of **3**. Hydrogen atoms belonged to C atoms are omitted for clarity.

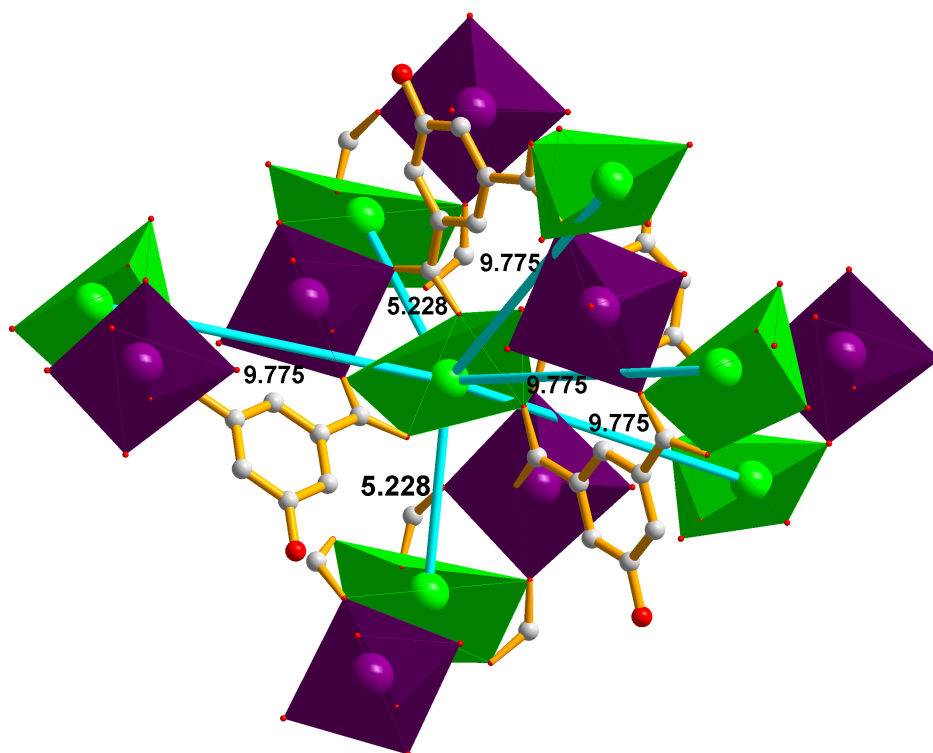

Fig. S8 View of the topological simplification mode of compound **3**.

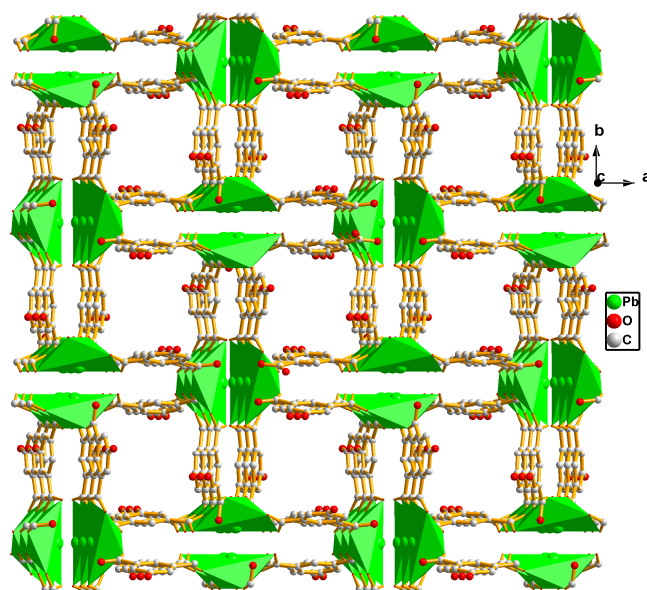

Fig. S9 Polyhedral view of the 3D anionic microporous framework with Ca(II) ions and CH<sub>3</sub>OH molecules omitted for **3**. Hydrogen atoms are omitted for clarity.

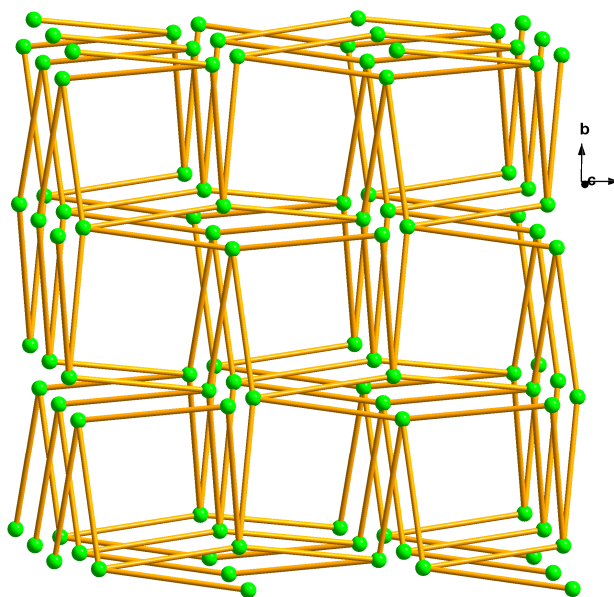

Fig. S10 The **lvt** topological net of the Ca(II)-omitted anionic network in **3**.

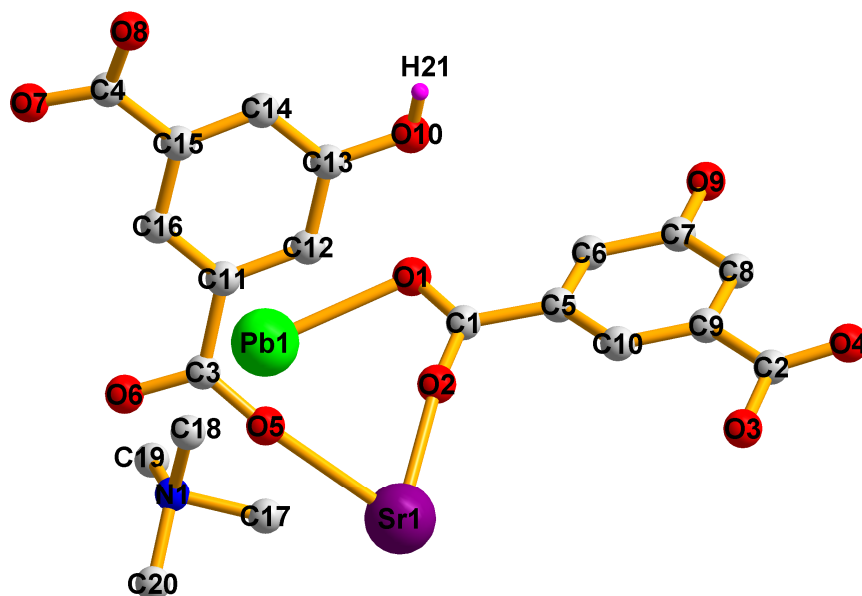

Fig. S11 View of the asymmetric unit of **4**. Hydrogen atoms belonged to C atoms are omitted for clarity.

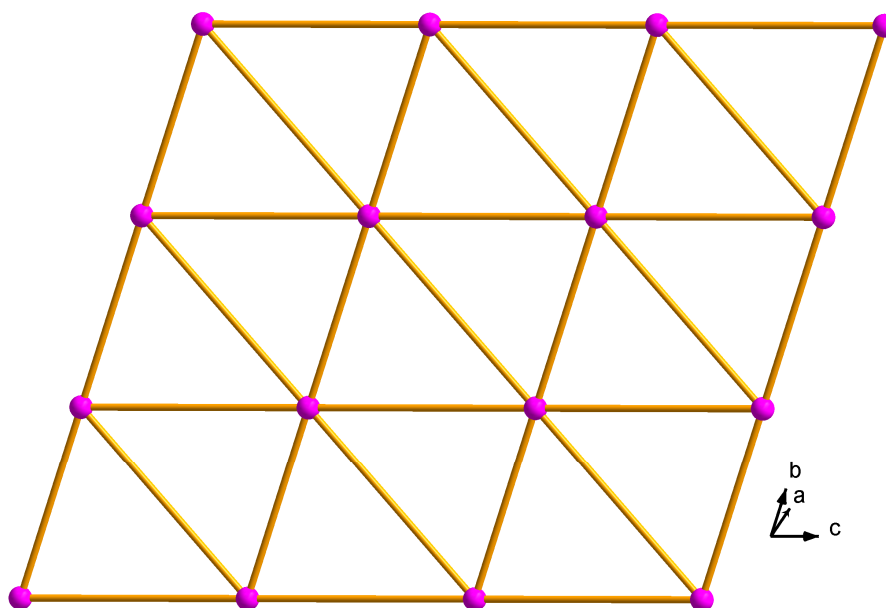

Fig. S12 View of the (6, 3)-topology network for the the 2D layer substructure in **4** constructed from the tetrametallic  $\text{Pb}_2\text{Sr}_2\text{O}_{20}$  cluster (SBU) and  $\mu_5\text{-O-}m\text{-BDC}^{3-}$  anion.



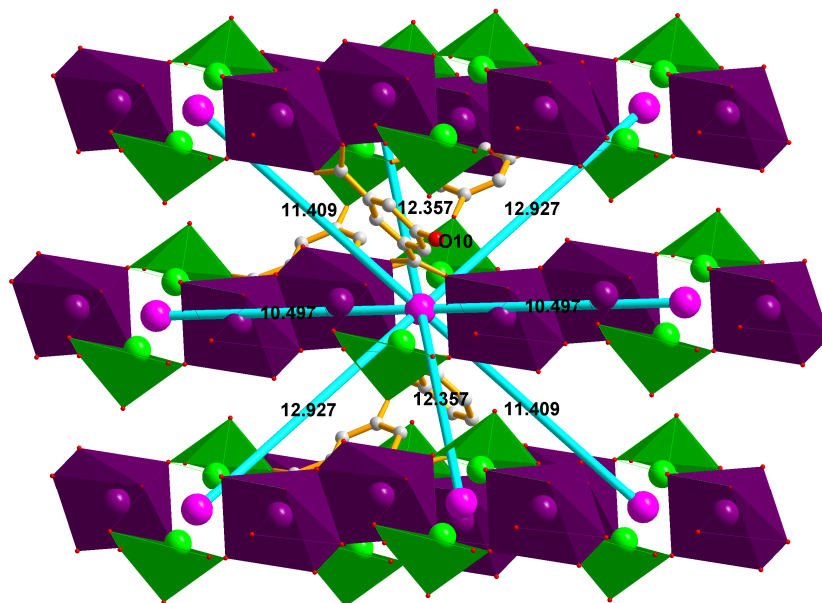

Fig. S13 View of the topological simplification mode of compound 4.

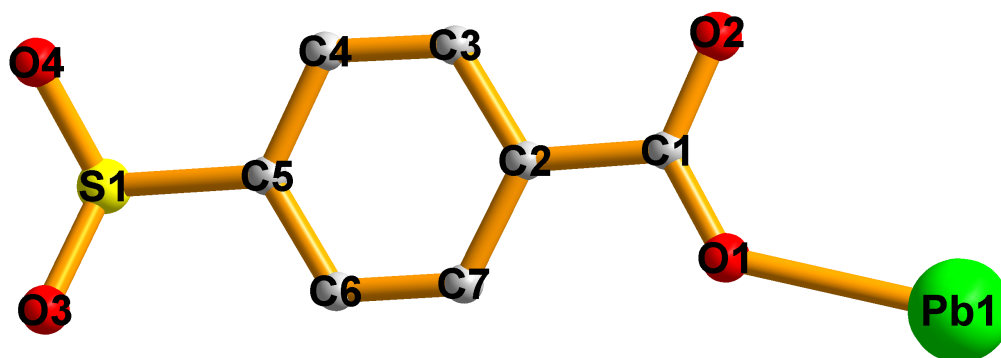

Fig. S14 View of the asymmetric unit of 5. Hydrogen atoms are omitted for clarity.

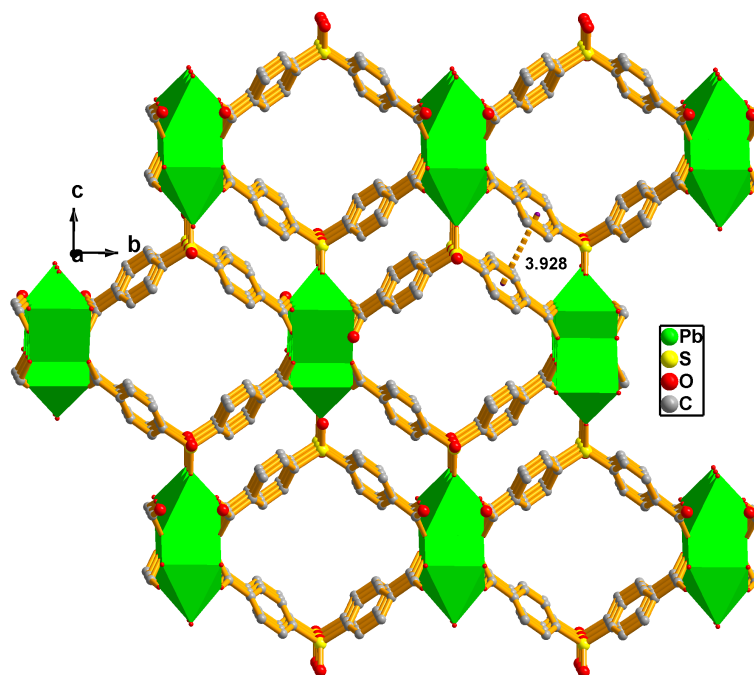

Fig. S15 View of the weak offset  $\pi\cdots\pi$  intramolecular interactions in the 3D framework of **5**.

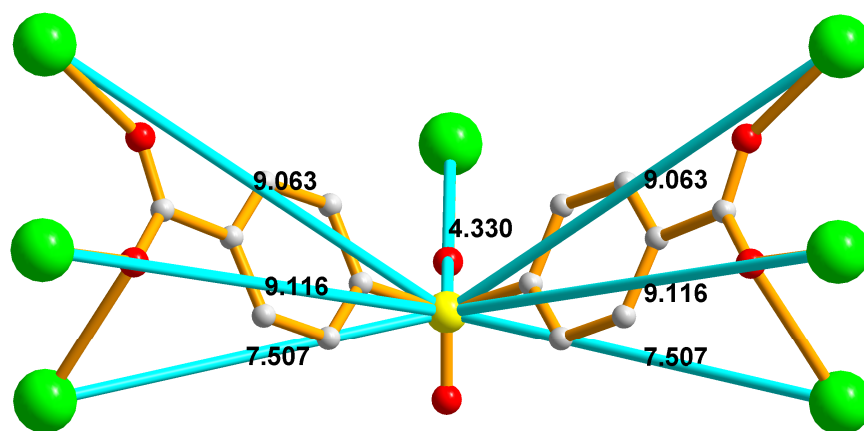

Fig. S16 View of the topological simplification mode of compound **5**.

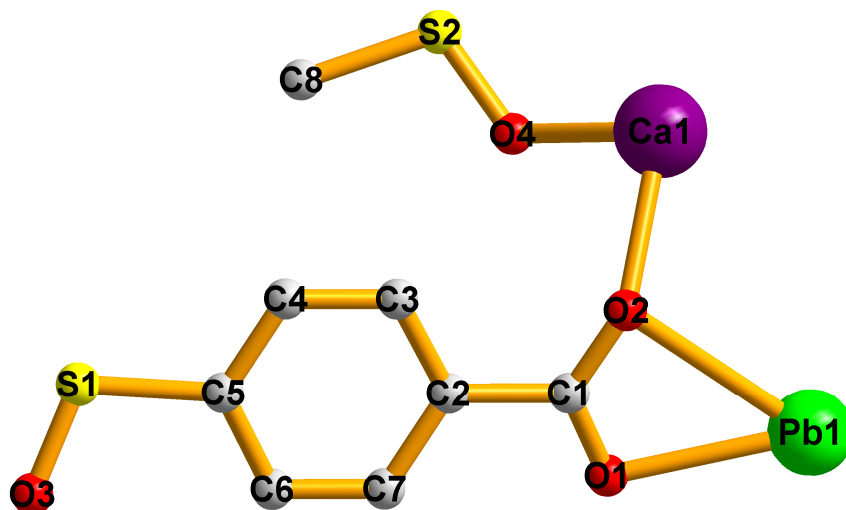

Fig. S17 View of the asymmetric unit of **6**. Hydrogen atoms are omitted for clarity.

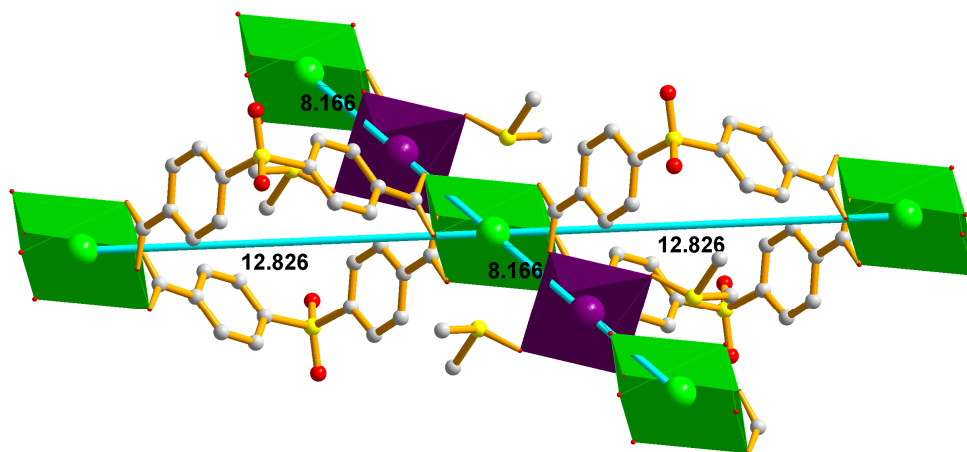

Fig. S18 View of the topological simplification mode of compound **6**.

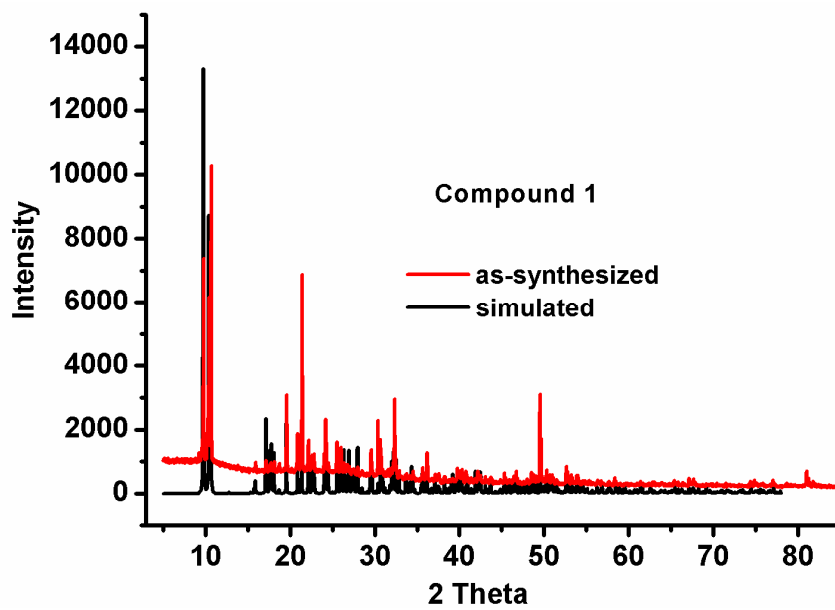

(a)

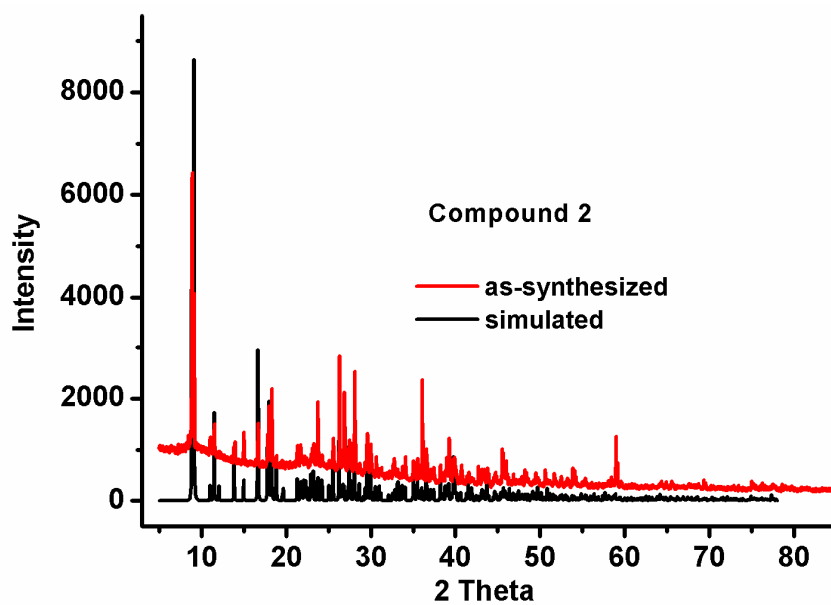

(b)

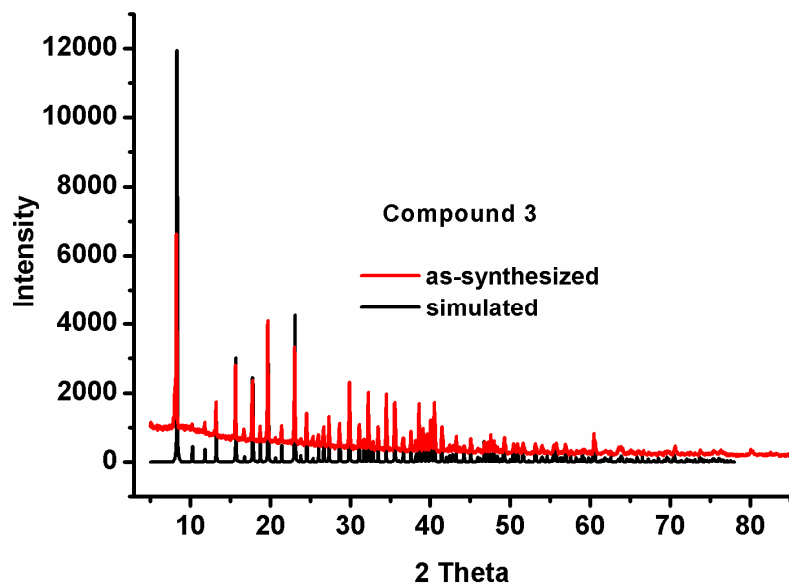

(c)

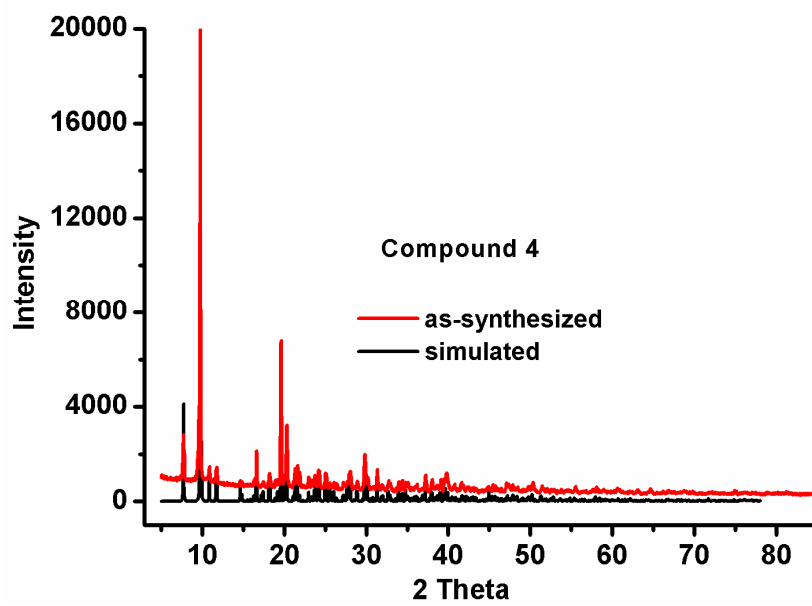

(d)

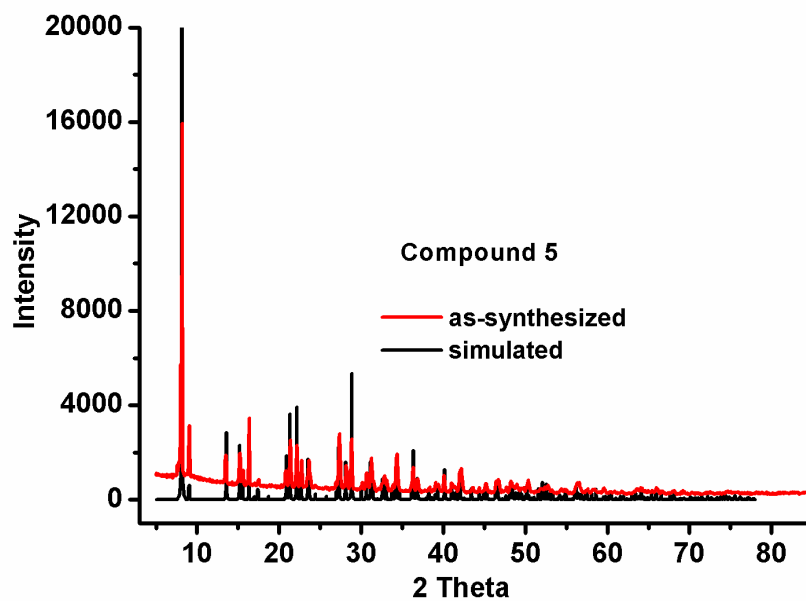

(e)

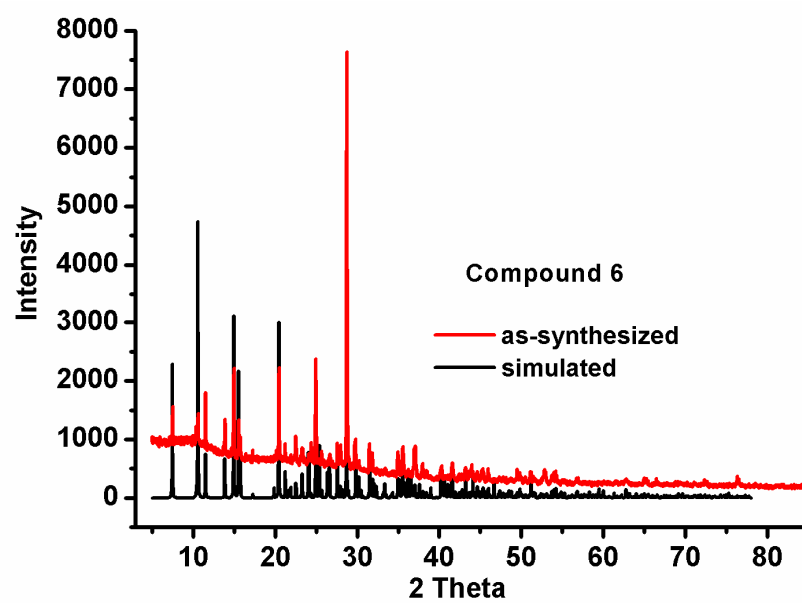

(f)

Fig. S19 The power X-ray diffraction patterns for compounds 1–6

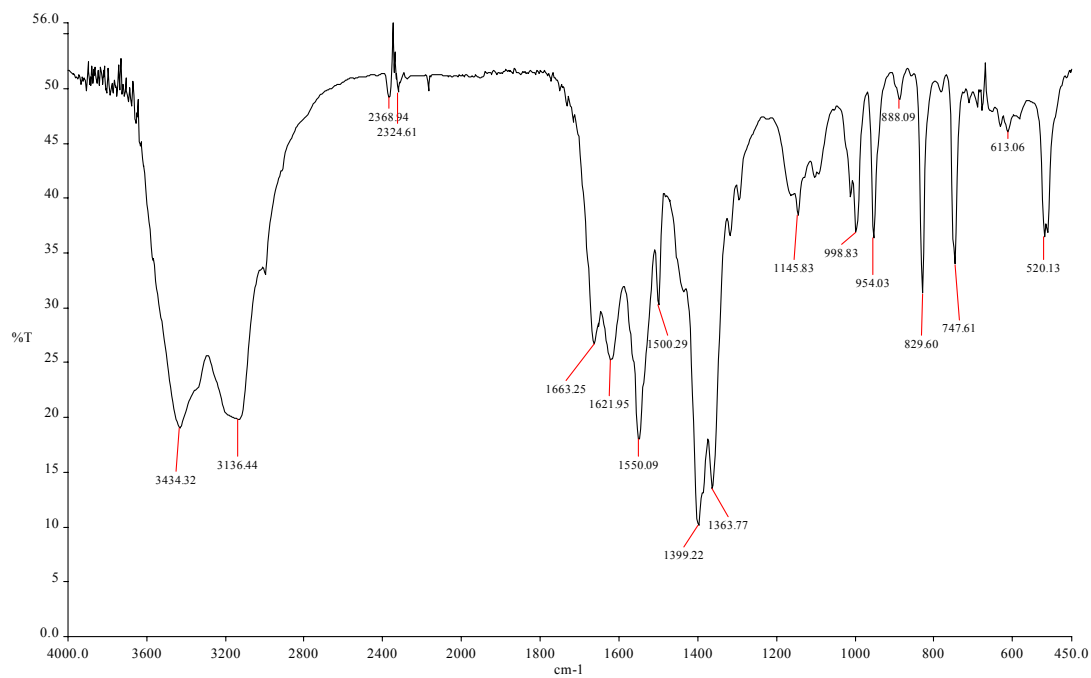

Compound 1

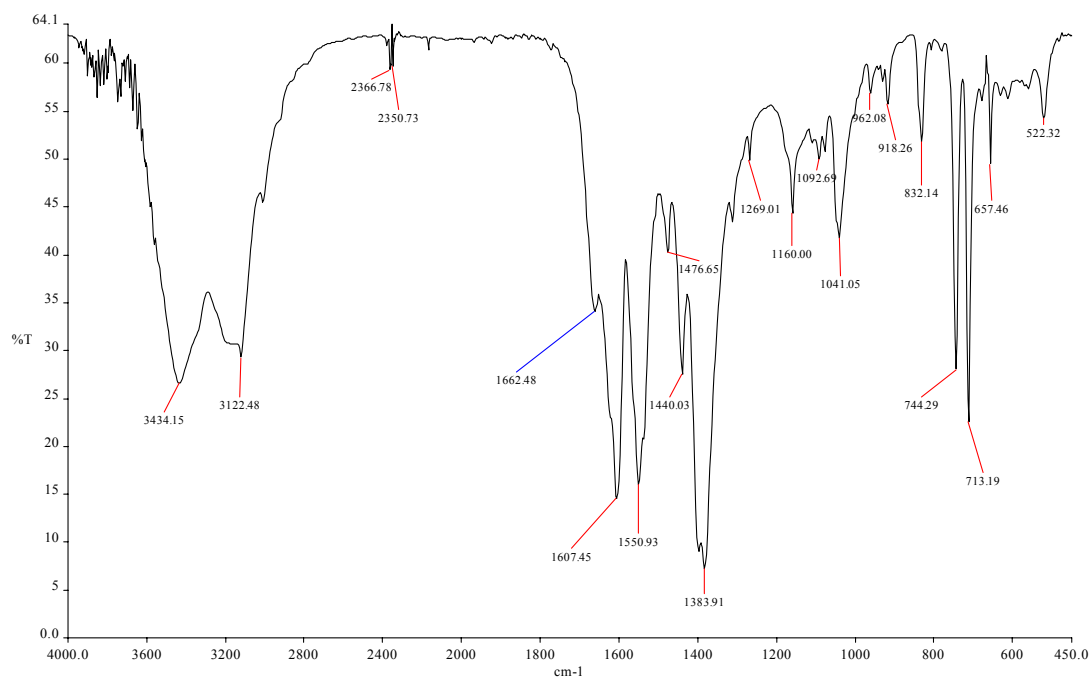

Compound 2

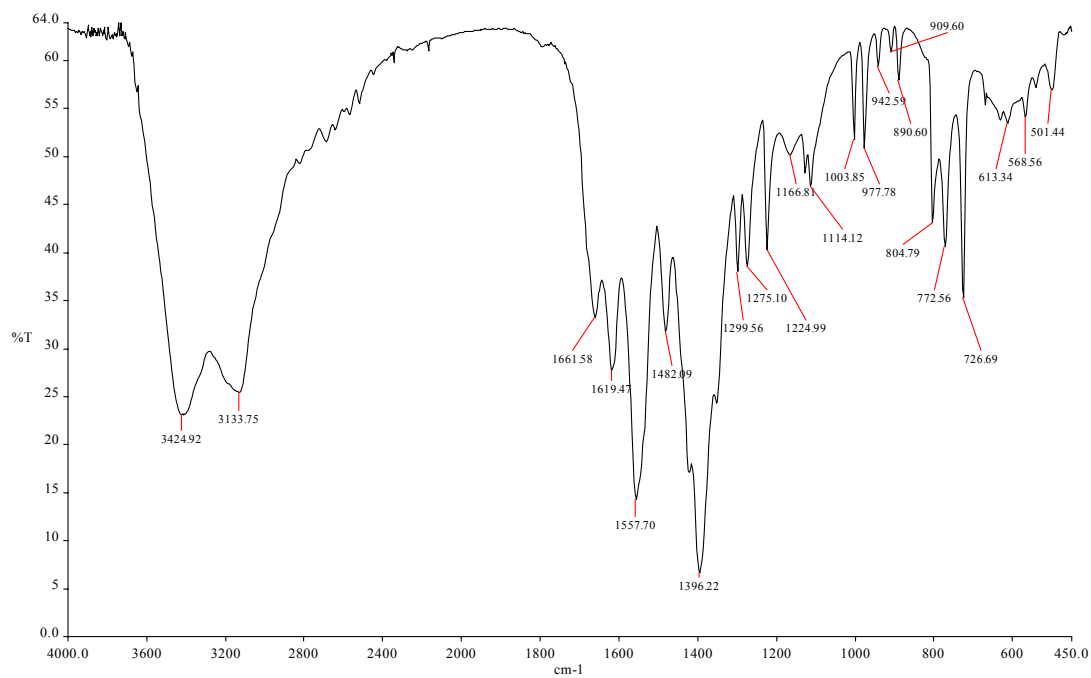

Compound 3

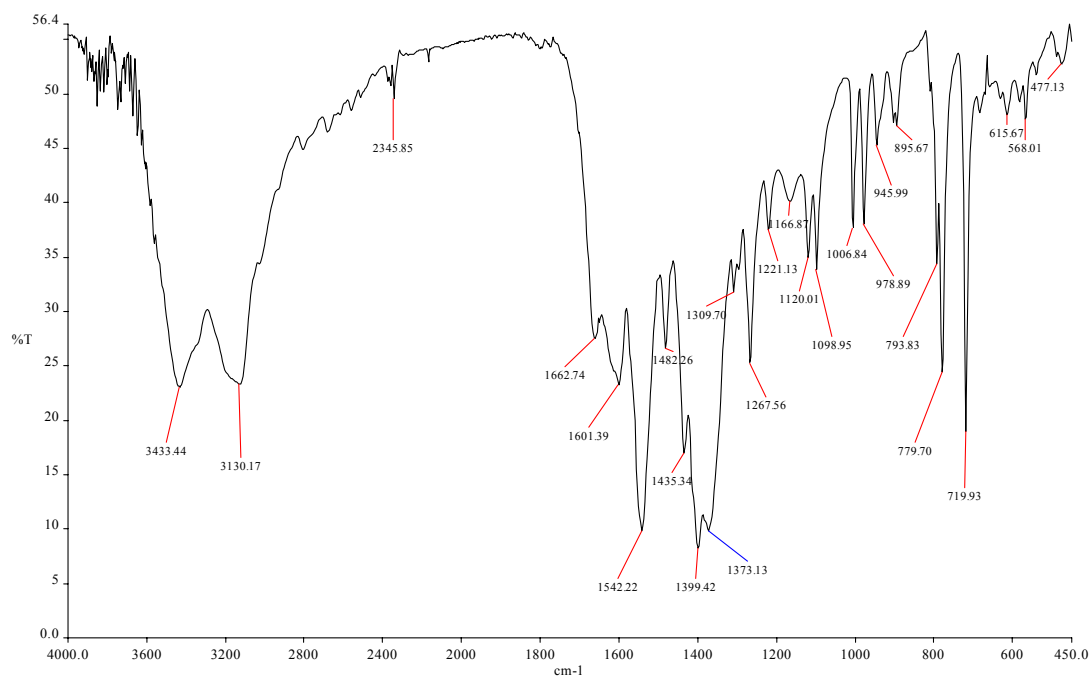

Compound 4



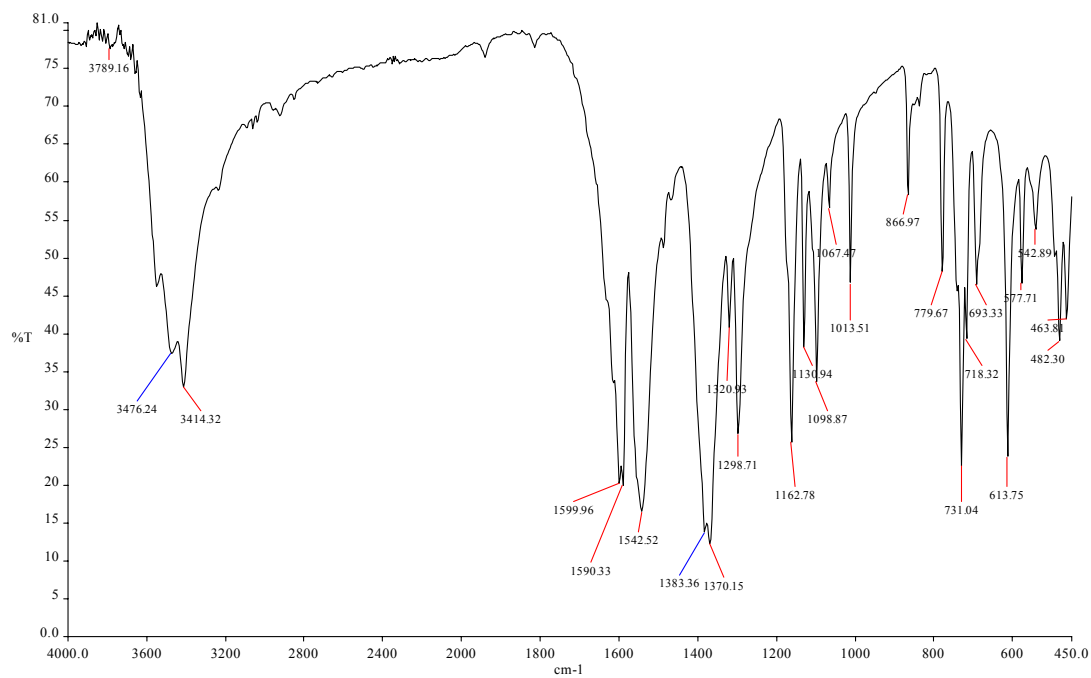

Compound 5

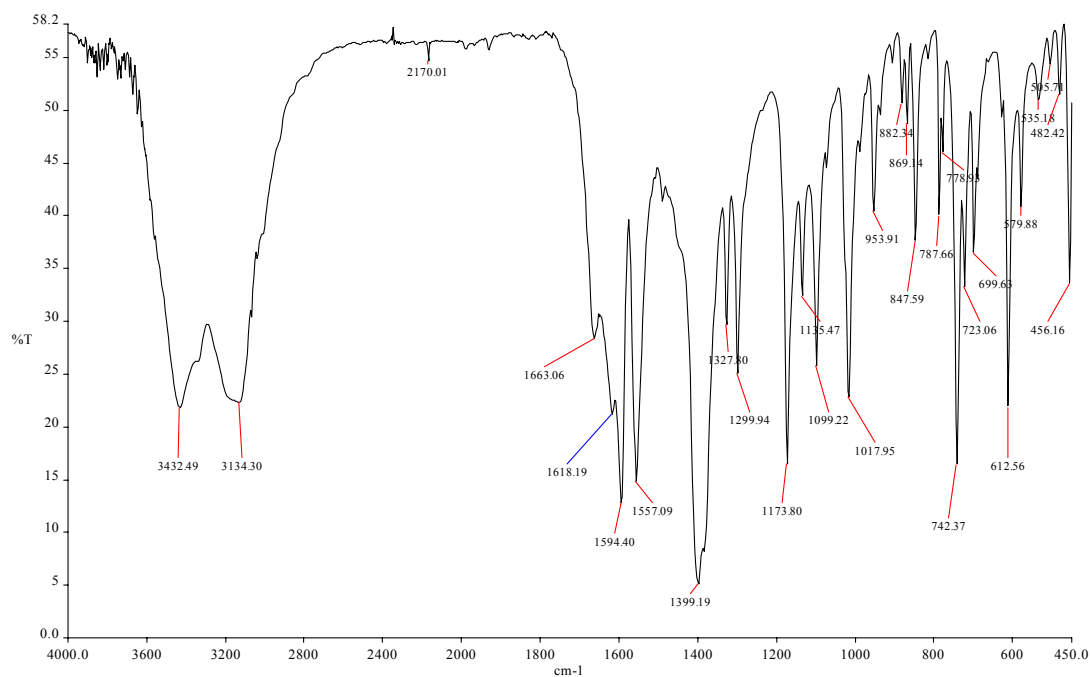

Compound 6

Fig. S20 IR spectra of compounds 1–6

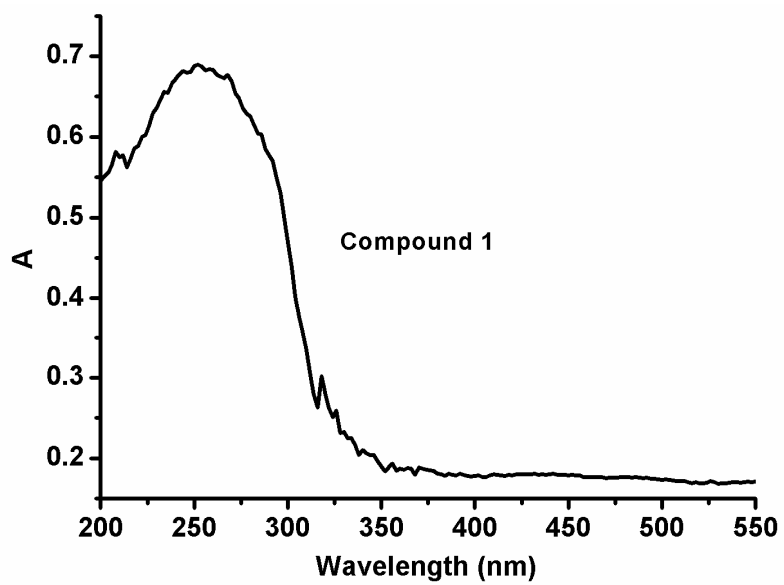

(a)

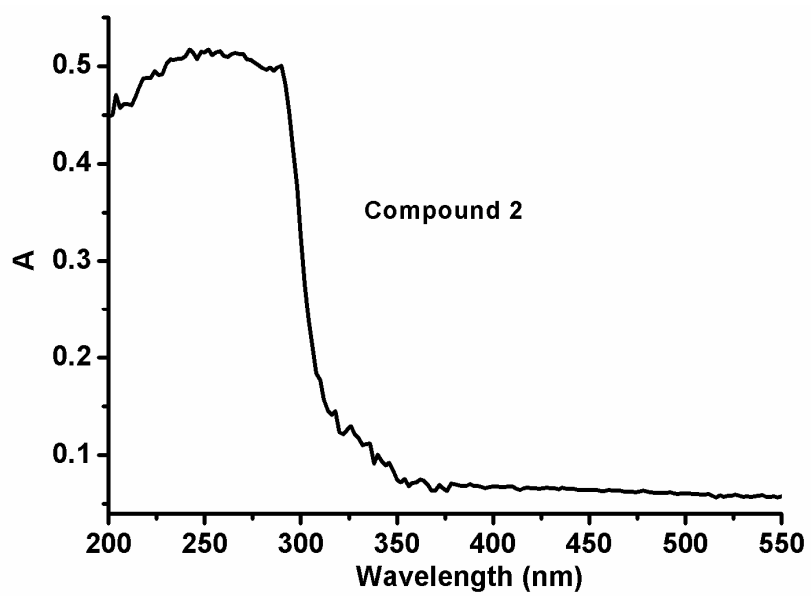

(b)

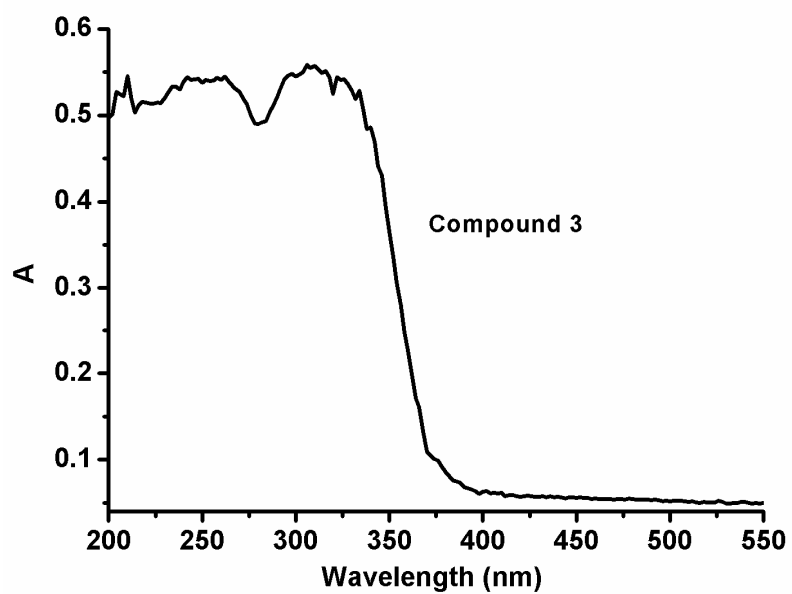

(c)

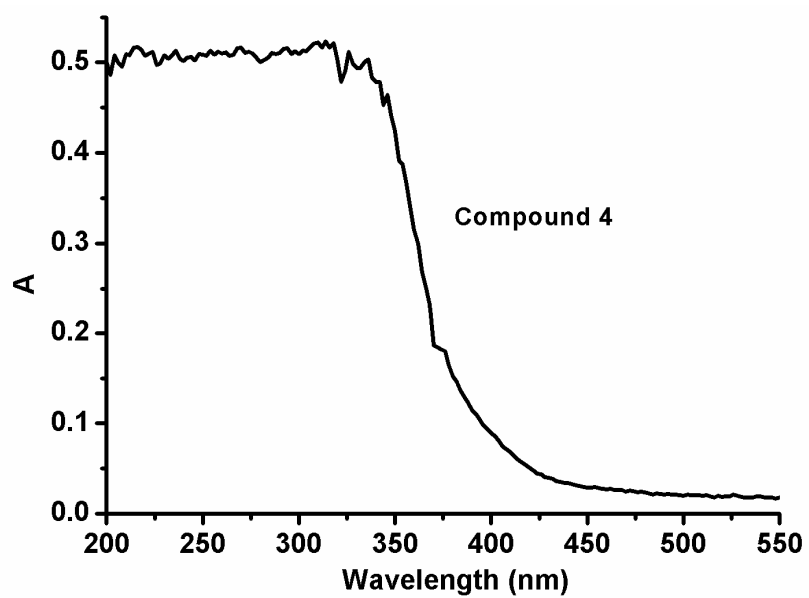

(d)

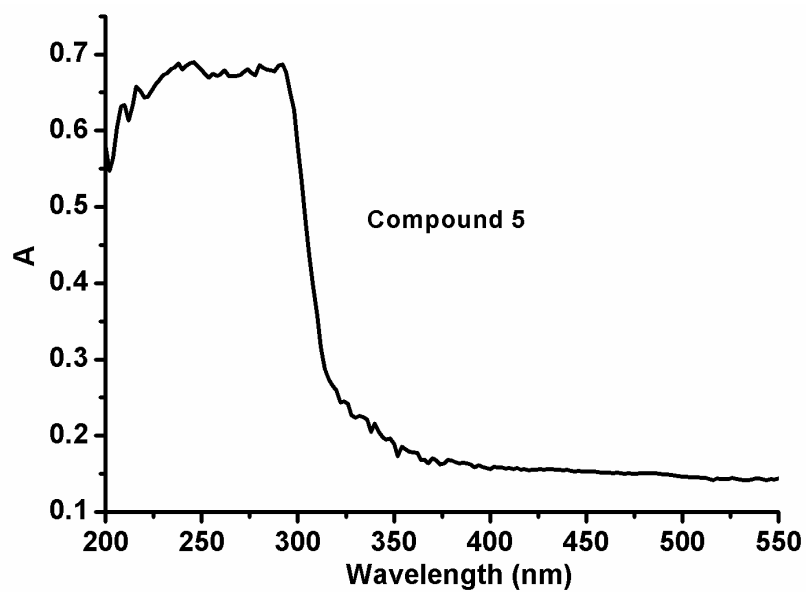

(e)

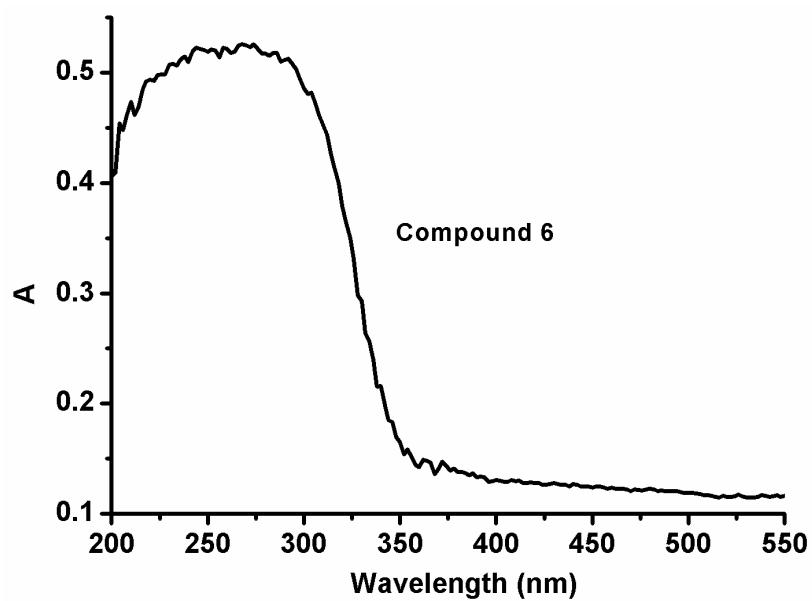

(f)

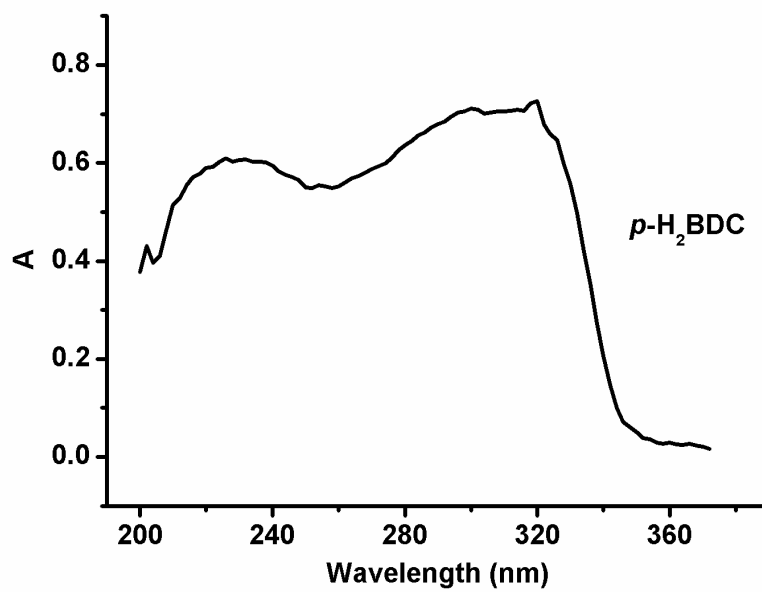

(g)

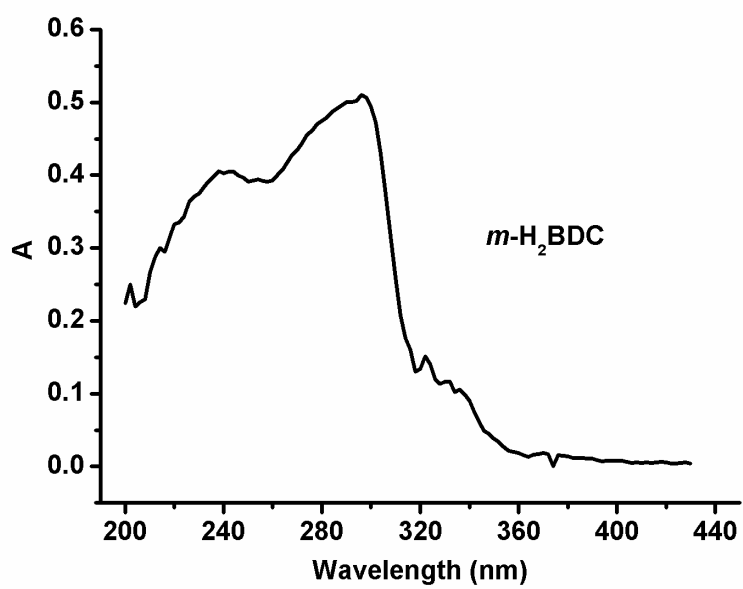

(h)

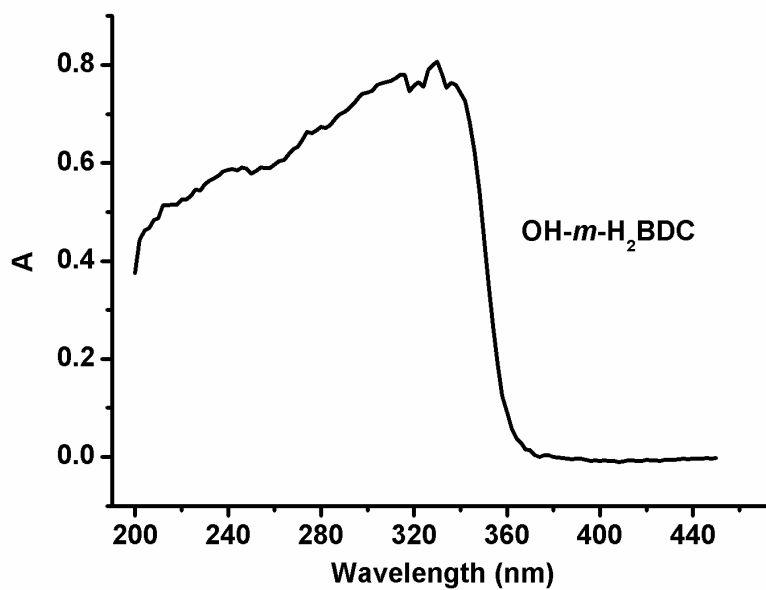

(i)

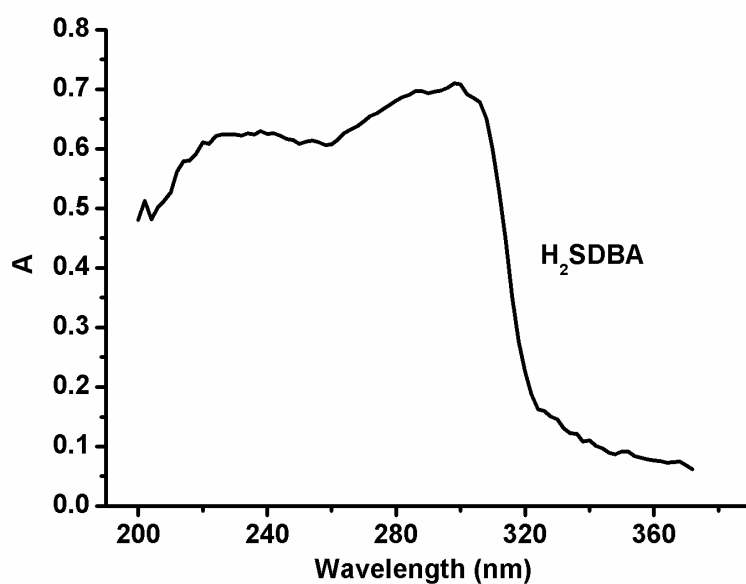

(j)

Fig. S21 The UV absorption spectra for compounds 1–6 (a–f) and the four free polycarboxylate ligands (g–j) in the solid state at room temperature.

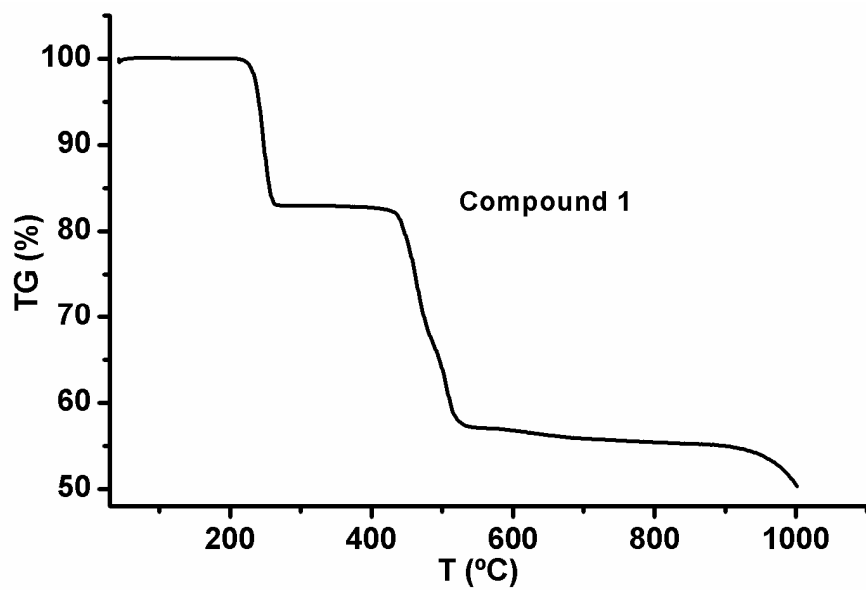

(a)

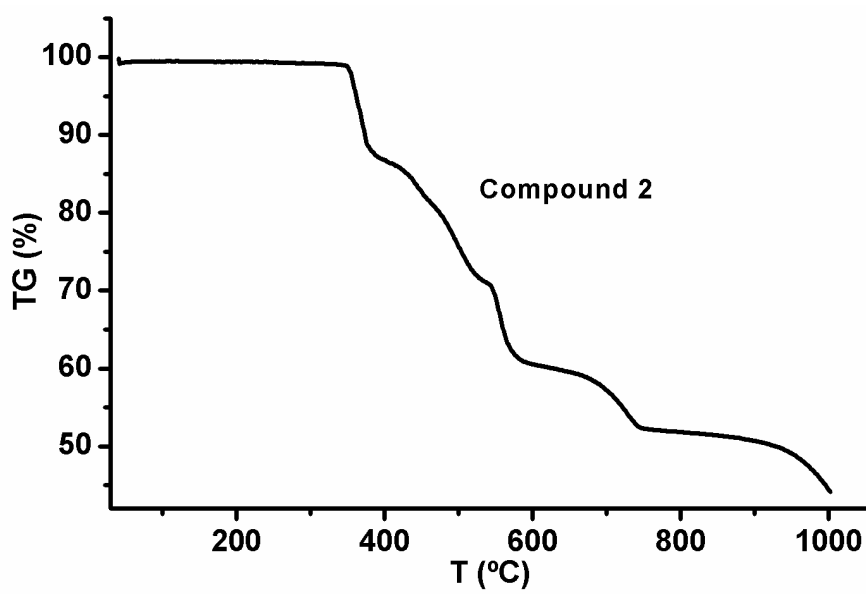

(b)

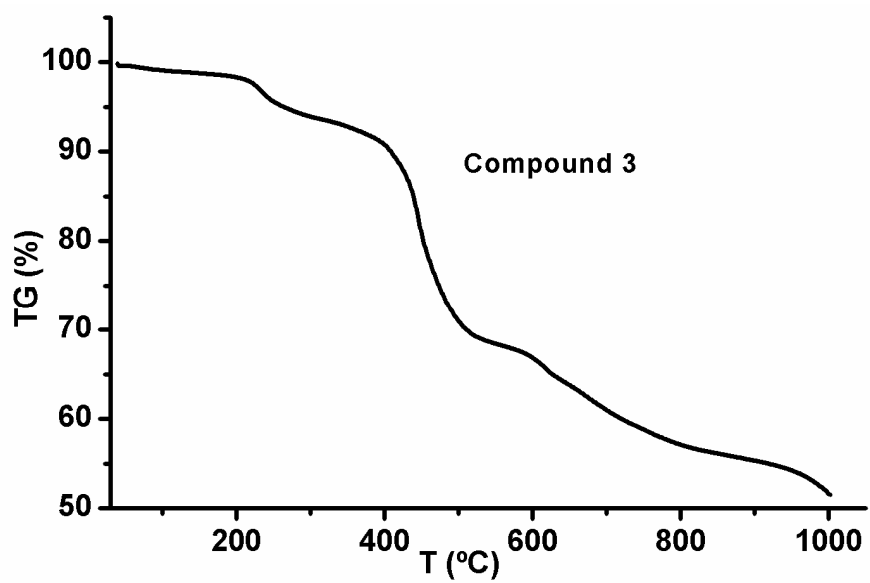

(c)

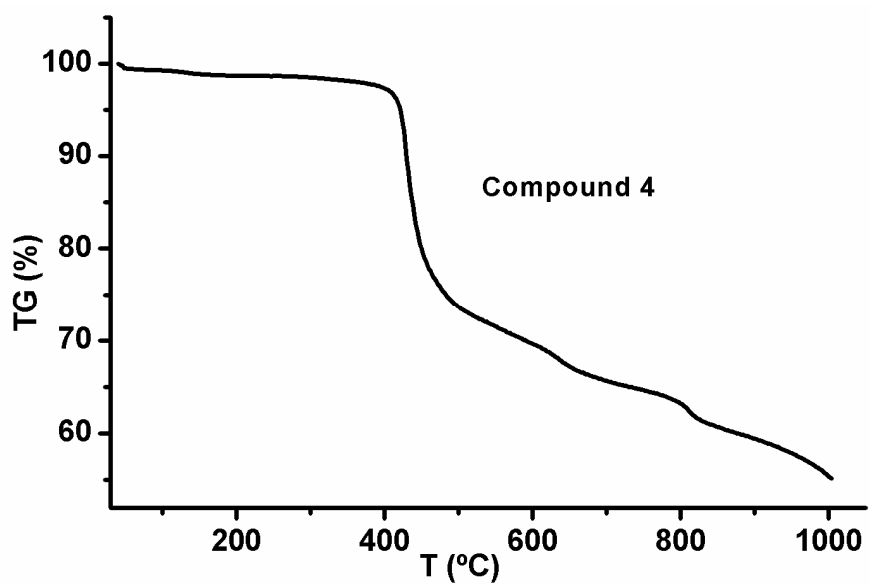

(d)



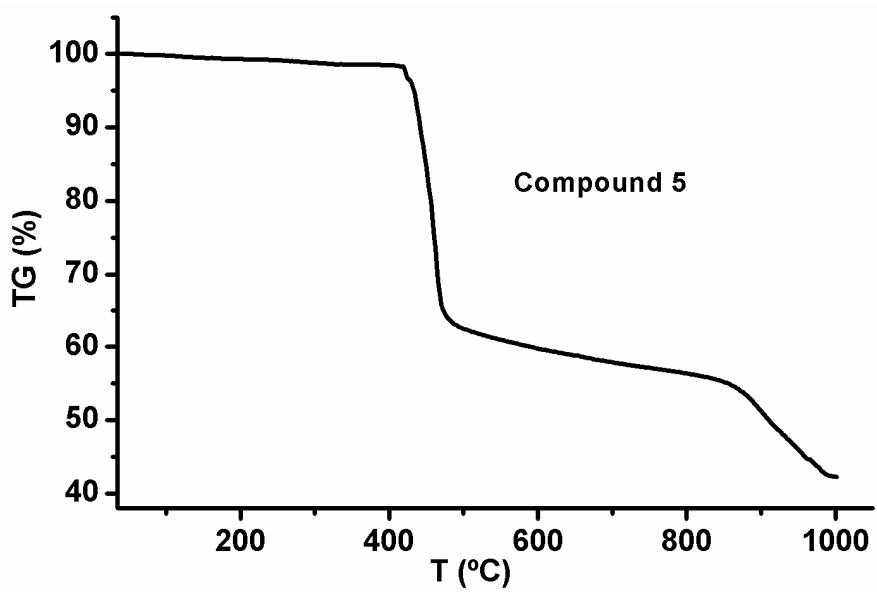

(e)

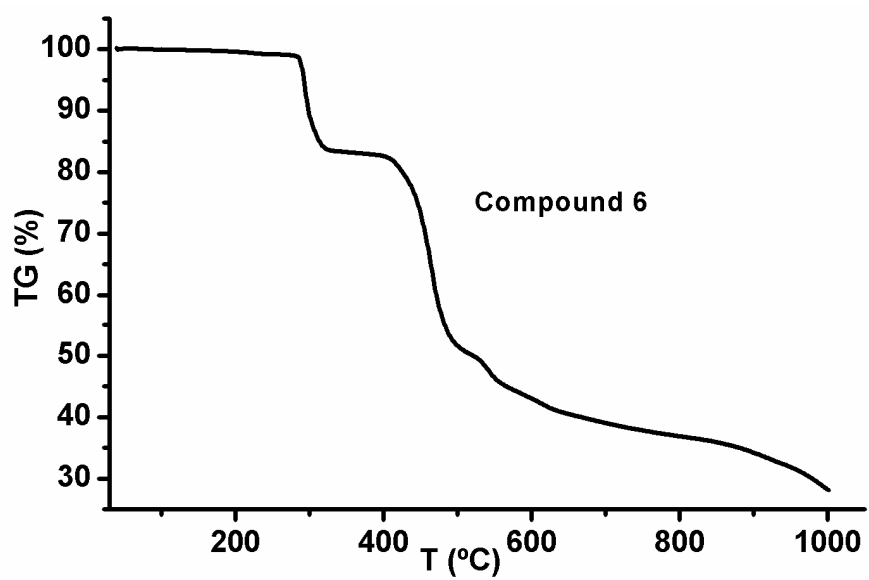

(f)

Fig. S22 TGA curves for compounds 1–6

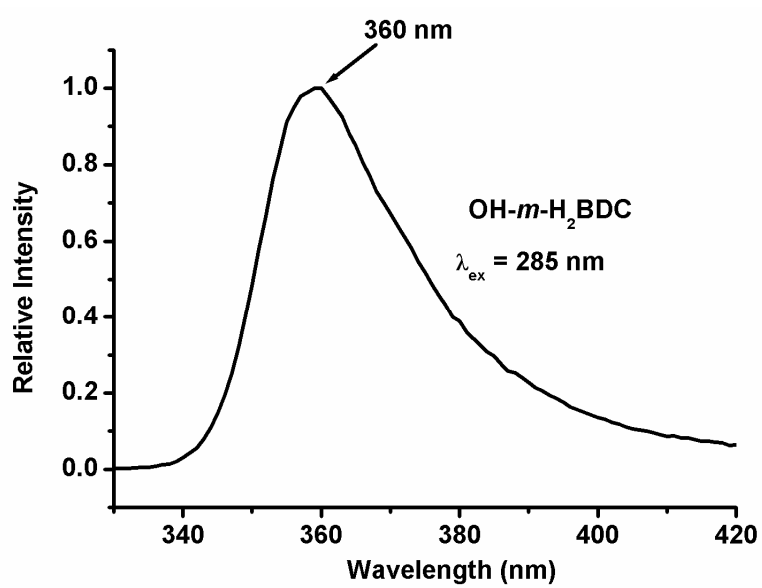

Fig. S23 Emission spectrum for the free OH-*m*-H<sub>2</sub>BDC ligand in the solid state at room temperature.
